# Supplementary material for: Analysis of the Peripapillary and Macular Regions Using OCT Angiography in Patients with Schizophrenia and Bipolar Disorder
Source: MDPI journal article supplement (doi:10.3390/jcm10184131), 2021-09-13
Supplement: s1 [file s1]

## STATISTICAL ANALYSIS

The obtained results were analyzed statistically. The values of the analyzed measurable parameters were presented by means of the mean value, median and standard deviation, and for non-measurable ones—by the number and percentage. For measurable features, the normal distribution of the analyzed parameters was assessed using the Shapiro-Wilk test.

The Kruskal-Wallis test was used to compare multiple independent groups with the use of multiple comparison analysis. A significance level of  $p < 0.05$  was adopted, indicating the existence of statistically significant differences. The database and statistical research were carried out on the basis of the STATISTICA 13.0 computer software (StatSoft, Poland).

## Findings

The study included 70 patients (eyes), including 34.29% ( $n = 24$ ) with schizophrenia, 22.86% ( $n = 16$ ) with bipolar disorder and 42.85% ( $n = 30$ ) from the control group.

The conducted studies did not show statistically significant differences in the assessment of individual RPC Density% parameters between the groups ( $p > 0.05$ ), with the exception of the Whole capillary assessment ( $p = 0.02$ ), where the values were significantly lower in the group with schizophrenia compared to the respondents with bipolar disorder or control. (table 1).

Supplementary Table S1. Evaluation of RPC Density% parameters in groups.

| RPC Density %   | Schizophrenia |        |      | Bipolar Disorder |        |      | Control Group |         |      | Statistical Analysis |
|-----------------|---------------|--------|------|------------------|--------|------|---------------|---------|------|----------------------|
|                 | Mean          | Median | SD   | Mean             | Median | SD   | Mean          | Mediana | SD   |                      |
| Whole capillary | 48.09         | 49.20  | 3.09 | 49.99            | 50.65  | 1.95 | 50.10         | 50.50   | 2.63 | H=7.86, p=0.02*      |
| superior        | 51.71         | 52.00  | 6.02 | 51.44            | 51.00  | 5.99 | 52.90         | 53.00   | 3.38 | H=0.75, p=0.69       |
| nasal           | 52.58         | 52.00  | 7.76 | 52.56            | 51.50  | 5.73 | 53.77         | 53.50   | 5.30 | H=0.78, p=0.68       |
| inferior        | 52.42         | 51.50  | 5.14 | 52.06            | 52.00  | 4.55 | 54.10         | 54.00   | 3.71 | H=3.77, p=0.15       |
| temporal        | 50.58         | 51.50  | 6.82 | 50.50            | 50.50  | 5.79 | 52.17         | 53.00   | 4.34 | H=0.97, p=0.61       |

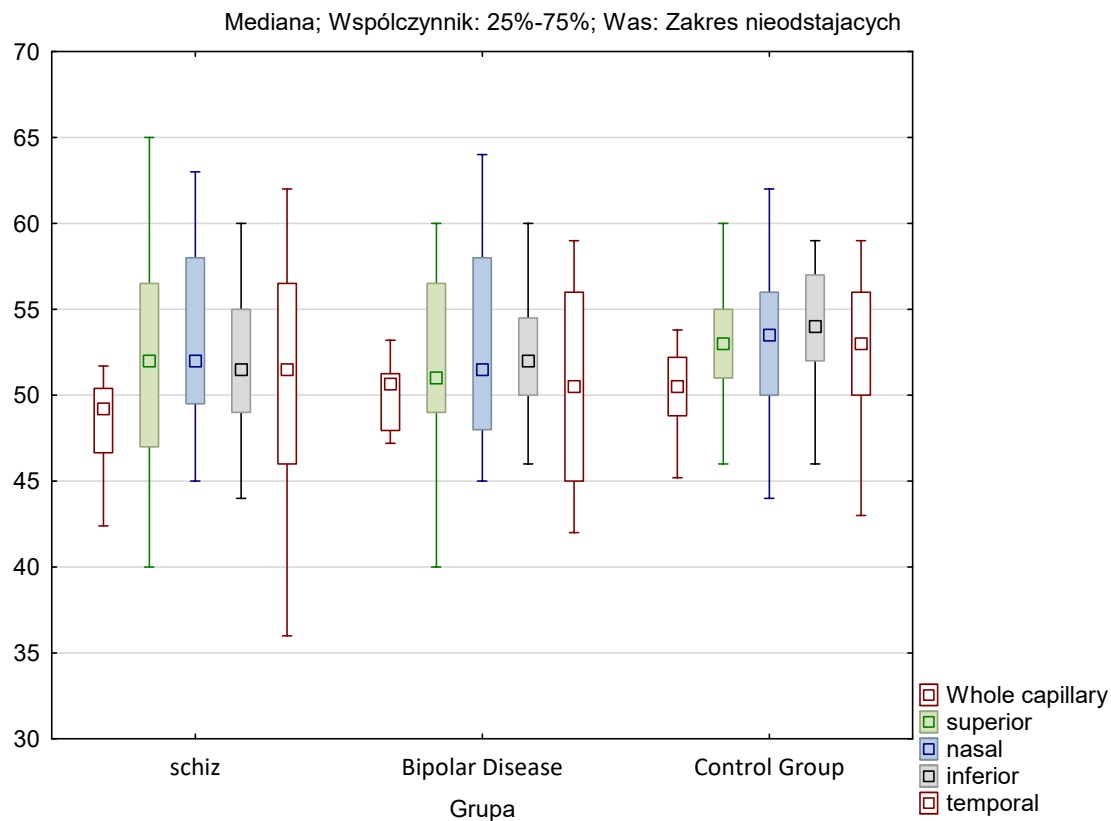

Supplementary Figure S1. Evaluation of RPC Density% parameters in groups

The conducted studies did not show statistically significant differences in the assessment of individual RPC RNFL  $\mu\text{m}$  parameters between the groups ( $p > 0.05$ ) (Table 2).

Supplementary Table S2. Evaluation of RNFL  $\mu\text{m}$  parameters in groups

| RNFL $\mu\text{m}$ | Schizophrenia |        |       | BD     |        |       | Control Group |        |       | Statistical Analysis |
|--------------------|---------------|--------|-------|--------|--------|-------|---------------|--------|-------|----------------------|
|                    | Mean          | Median | SD    | Mean   | Median | SD    | Mean          | Median | SD    |                      |
| Peripapillary      | 118.09        | 114.00 | 23.56 | 113.07 | 114.00 | 20.45 | 112.57        | 116.00 | 9.01  | H=0.98, p=0.61       |
| Superior2          | 137.17        | 138.00 | 20.10 | 140.00 | 138.00 | 28.05 | 132.63        | 135.00 | 10.06 | H=2.08, p=0.35       |
| Nasal2             | 97.42         | 98.50  | 18.72 | 96.69  | 96.00  | 15.72 | 100.14        | 99.00  | 11.47 | H=0.70, p=0.71       |
| Inferior2          | 142.63        | 140.50 | 20.78 | 138.31 | 132.00 | 29.41 | 140.20        | 146.00 | 13.15 | H=0.57, p=0.75       |
| Temporal2          | 79.04         | 76.50  | 12.84 | 76.69  | 68.50  | 16.78 | 76.60         | 79.00  | 11.16 | H=0.90, p=0.64       |

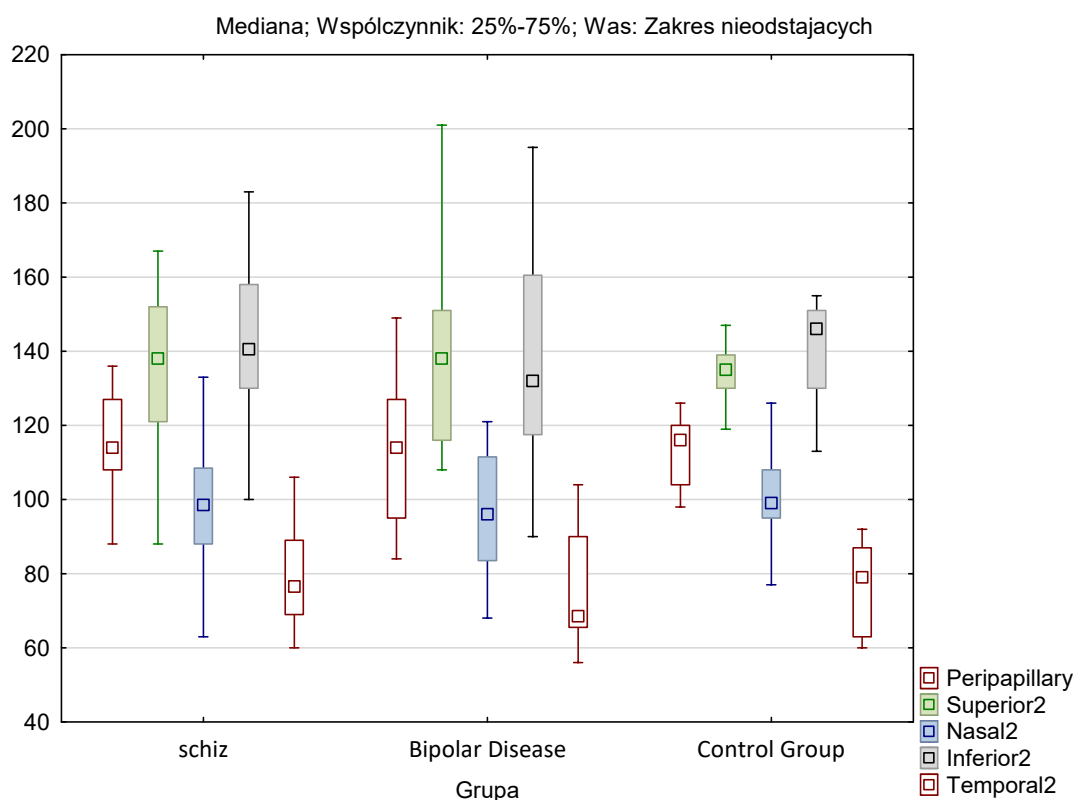

Supplementary Figure S2. Assessment of RNFL  $\mu\text{m}$  parameters in groups.

Statistical analysis showed highly significant differences between the groups as assessed by Whole deep ( $p < 0.0001$ ), where values were significantly lower in the group with schizophrenia. The analysis of multiple comparisons showed differences between the group with schizophrenia and the control group ( $Z = 4.30$ ;  $p = 0.00005$ ) and between the control group and the group with bipolar disorder ( $Z = 3.09$ ;  $p = 0.006$ ). control and bipolar group ( $p > 0.05$ ). However, no significant differences were found between the groups in the assessment of the remaining parameters of Macula/Density% ( $p > 0.05$ ) (Table 3).

Supplementary Table S3. Evaluation of Macula / Density% parameters in groups

| Macula/Density % | Schizophrenia |        |      | BD    |        |      | Control Group |        |      | Statistical Analysis |
|------------------|---------------|--------|------|-------|--------|------|---------------|--------|------|----------------------|
|                  | Mean          | Median | SD   | Mean  | Median | SD   | Mean          | Median | SD   |                      |
| Whole sup.       | 47.93         | 48.40  | 3.37 | 48.56 | 48.60  | 3.13 | 47.80         | 48.10  | 2.84 | H=0.55, p=0.76       |
| Whole deep       | 43.66         | 42.45  | 5.50 | 50.41 | 49.25  | 6.54 | 50.66         | 51.45  | 4.26 | H=19.91, p<0.0001*   |
| Fovea sup.       | 24.15         | 24.95  | 6.96 | 23.59 | 21.45  | 9.45 | 21.27         | 20.75  | 3.86 | H=3.00, p=0.22       |
| Fovea deep       | 38.81         | 40.40  | 7.74 | 39.38 | 37.40  | 8.64 | 38.43         | 39.00  | 4.87 | H=1.15, p=0.56       |

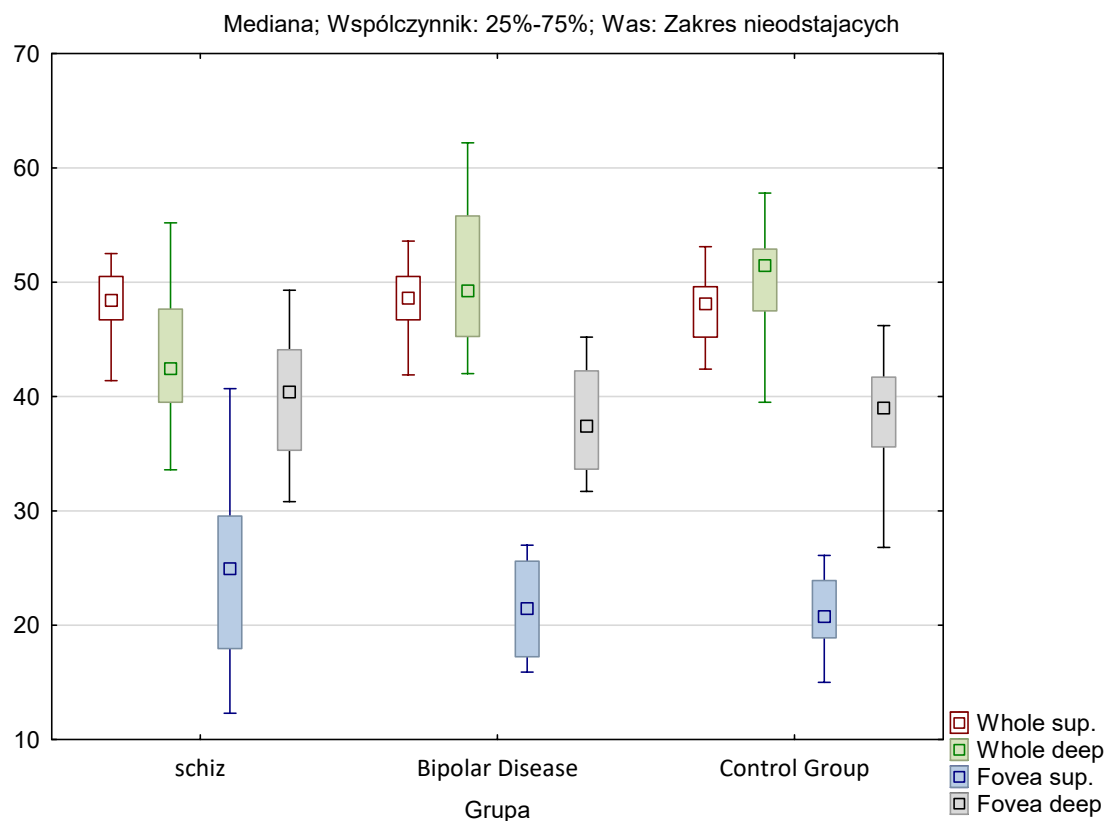

Supplementary Figure S3. Assessment of Macula/Density% parameters in groups.

Statistical analysis showed highly significant differences between the groups in terms of Whole ( $p < 0.0001$ ) and Fovea ( $p = 0.02$ ). The analysis of multiple comparisons showed that the Whole parameter was significantly higher in the control group compared to the group with schizophrenia ( $Z = 4.53$ ;  $p = 0.00002$ ) and compared to the group with bipolar disorder ( $Z = 5.03$ ;  $p = 0.000001$ ), however, no differences in the Whole assessment were found between schizophrenia and bipolar disorder ( $p > 0.05$ ). In the evaluation of the Fovea parameter, in the analysis of multiple comparisons, differences were found between the control group and bipolar disorder ( $Z = 2.71$ ;  $p = 0.02$ ), while between the other groups the differences were not statistically significant ( $p > 0.05$ ).

Supplementary Table S4. Evaluation of Macula thickness  $\mu\text{m}$  parameters in groups

| Macula Thickness $\mu\text{m}$ | Schizophrenia |        |       | BD     |        |       | Control Group |        |       | Statistical Analysis    |
|--------------------------------|---------------|--------|-------|--------|--------|-------|---------------|--------|-------|-------------------------|
|                                | Mean          | Median | SD    | Mean   | Median | SD    | Mean          | Median | SD    |                         |
| Whole                          | 284.25        | 283.00 | 14.77 | 278.50 | 273.50 | 12.59 | 305.23        | 301.50 | 11.33 | H=33.05, $p < 0.0001^*$ |
| Fovea                          | 260.67        | 262.00 | 24.28 | 249.63 | 244.00 | 21.43 | 263.53        | 263.50 | 15.37 | H=7.41, $p = 0.02^*$    |

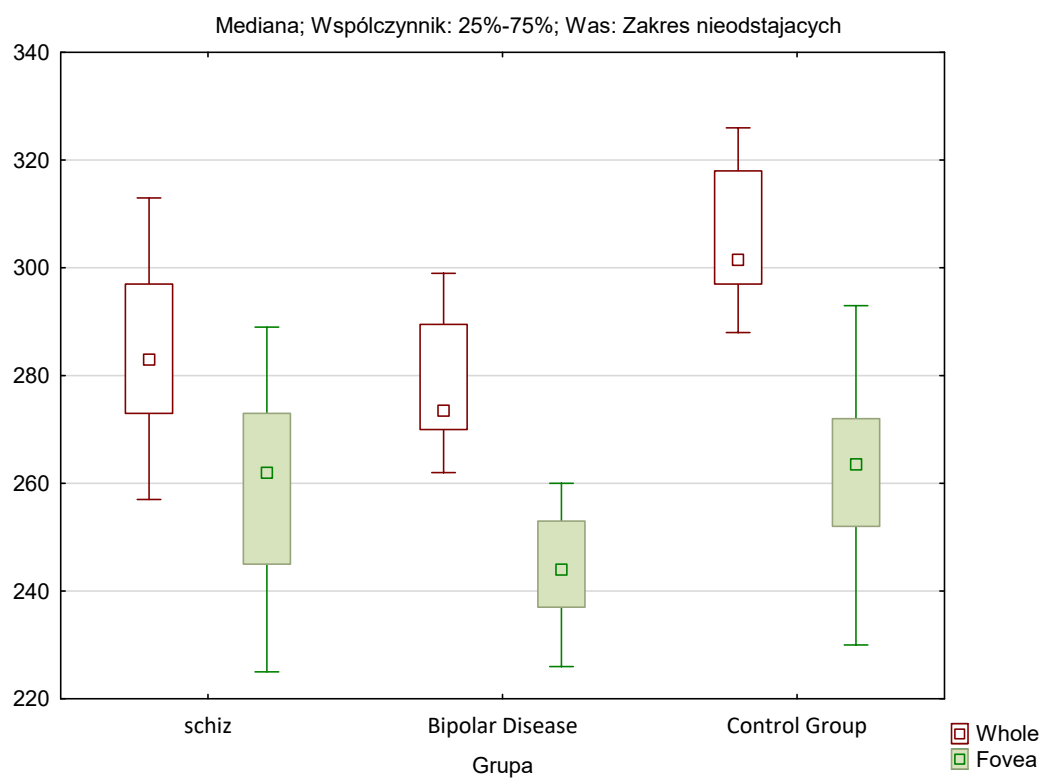

Supplementary Figure S4. Assessment of Macula thickness  $\mu\text{m}$  parameters in groups.
